# Supplementary material
Source: MDPI journal article supplement (https://www.mdpi.com/2073-4395/11/8/1602)
Supplement: s1 [file s1]

**Table S1.** Plant growth and infection factors of RKN-inoculated susceptible tomato, egg, and pepper young plants untreated and treated with different amounts per plant of Tellus, and Tusal. Plant weight is expressed in gram (PW) and the determined infection factor was the numbers of sedentary forms per gram root fresh weight (SFs/g rfw). Values are expressed as means  $\pm$  standard deviations that are separated by a *t*-test (\**P*<0.05; \*\**P*<0.01). In parentheses, the effect of treatments on plant growth and nematode infection, if significant, is expressed as percentage with respect to the controls (100%). Doses chosen for further investigation are in bold.

|                  | untreated                     | Tellus-treated                       | untreated                     | Tellus-treated                      | untreated     | Tellus-treated       |
|------------------|-------------------------------|--------------------------------------|-------------------------------|-------------------------------------|---------------|----------------------|
| <b>tomato</b>    |                               | <b>0.04 g/plant</b>                  |                               | 0.35 g/plant                        |               | 1.1 g/plant          |
| PW               | <b>8.1<math>\pm</math>2.6</b> | <b>8.1<math>\pm</math>2.6</b>        | 8.9 $\pm$ 2.6                 | 7.4 $\pm$ 3.0*(-16)                 | 9.2 $\pm$ 3.7 | 7.3 $\pm$ 3.2**(-20) |
| SFs/g rfw        | <b>94<math>\pm</math>49</b>   | <b>39<math>\pm</math>13**(-59)</b>   | 96 $\pm$ 24                   | 95 $\pm$ 28                         | 91 $\pm$ 39   | 151 $\pm$ 69**(+66)  |
| <b>egg plant</b> |                               |                                      |                               | <b>0.3-0.85 g/plant</b>             |               |                      |
| PW               |                               |                                      | <b>8.7<math>\pm</math>2.6</b> | <b>9.9<math>\pm</math>4.3*(+13)</b> |               |                      |
| SFs/g rfw        |                               |                                      | <b>128<math>\pm</math>46</b>  | <b>103<math>\pm</math>41**(-19)</b> |               |                      |
| <b>pepper</b>    |                               | <b>0.04 g/plant</b>                  |                               |                                     |               |                      |
| PW <sup>a</sup>  | <b>8.9<math>\pm</math>2.8</b> | <b>7.5<math>\pm</math>2.6**(-15)</b> |                               |                                     |               |                      |
| SFs/g rfw        | <b>112<math>\pm</math>41</b>  | <b>35<math>\pm</math>31**(-69)</b>   |                               |                                     |               |                      |
|                  | untreated                     | Tusal-treated                        | untreated                     | Tusal-treated                       | untreated     | Tusal-treated        |
| <b>tomato</b>    |                               | 0.02 g/plant                         |                               | <b>0.18 g/plant</b>                 |               | 0.43 g/plant         |
| PW               | 8.1 $\pm$ 1.7                 | 7.8 $\pm$ 2.3                        | <b>8.2<math>\pm</math>2.7</b> | <b>9.4<math>\pm</math>2.3*(+15)</b> | 8.0 $\pm$ 2.0 | 5.3 $\pm$ 1.7**(-34) |
| SFs/g rfw        | 103 $\pm$ 60                  | 156 $\pm$ 69*(+52)                   | <b>108<math>\pm</math>55</b>  | <b>48<math>\pm</math>30**(-56)</b>  | 89 $\pm$ 49   | 110 $\pm$ 83*(+24)   |
| <b>egg plant</b> |                               |                                      |                               | <b>0.2-0.6 g/plant</b>              |               |                      |
| PW               |                               |                                      | <b>7.2<math>\pm</math>1.5</b> | <b>8.0<math>\pm</math>2.8*(+12)</b> |               |                      |
| SFs/g rfw        |                               |                                      | <b>99<math>\pm</math>43</b>   | <b>74<math>\pm</math>37**(-25)</b>  |               |                      |
| <b>pepper</b>    |                               | <b>0.08 g/plant</b>                  |                               |                                     |               |                      |
| PW <sup>a</sup>  | <b>8.1<math>\pm</math>2.4</b> | <b>8.4<math>\pm</math>2.4</b>        |                               |                                     |               |                      |
| SFs/g rfw        | <b>103<math>\pm</math>48</b>  | <b>44<math>\pm</math>31**(-57)</b>   |                               |                                     |               |                      |
